# Supplementary material for: The role of intrathecal free light chains kappa for the detection of autoimmune encephalitis in subacute onset neuropsychiatric syndromes
Source: PubMed Central journal article supplement (PMC10567819; doi:10.1038/s41598-023-44427-6), 2023-10-11
Supplement: 41598_2023_44427_MOESM1_ESM.pdf [file 41598_2023_44427_MOESM1_ESM.pdf]

**Supplementary File 1. AIE<sup>+</sup> characteristics**

| AIE+ Pat. Nr. | Subacute onset (rapid progression of less than 3 months) of working memory deficits (short-term memory loss), altered mental status, or psychiatric symptoms | New focal CNS findings | Seizures not explained by a previously known seizure disorder | CSF pleocytosis (white blood cell count of more than five cells per mm <sup>3</sup> ) | EEG with epileptic or slow-wave activity involving the temporal lobes | MRI features suggestive of encephalitis | Reasonable exclusion of alternative causes | Bilateral brain abnormalities on T2-weighted fluid-attenuated inversion recovery MRI highly restricted to the medial temporal lobes | Response to first-line immunotherapy | Intrathecal FLCK synthesis | Antibody specification |
|---------------|--------------------------------------------------------------------------------------------------------------------------------------------------------------|------------------------|---------------------------------------------------------------|---------------------------------------------------------------------------------------|-----------------------------------------------------------------------|-----------------------------------------|--------------------------------------------|-------------------------------------------------------------------------------------------------------------------------------------|--------------------------------------|----------------------------|------------------------|
| 1             | +                                                                                                                                                            | +                      | -                                                             | +                                                                                     | +                                                                     | +                                       | +                                          | -                                                                                                                                   | +                                    | +                          | LGI-1                  |
| 2             | +                                                                                                                                                            | -                      | +                                                             | -                                                                                     | +                                                                     | +                                       | +                                          | -                                                                                                                                   | -                                    | +                          | LGI-1                  |
| 3             | +                                                                                                                                                            | -                      | +                                                             | +                                                                                     | -                                                                     | +                                       | +                                          | -                                                                                                                                   | +                                    | +                          | NMDA                   |
| 4             | +                                                                                                                                                            | +                      | -                                                             | +                                                                                     | -                                                                     | -                                       | +                                          | -                                                                                                                                   | +                                    | +                          | IgLON5                 |
| 5             | +                                                                                                                                                            | +                      | -                                                             | +                                                                                     | -                                                                     | +                                       | +                                          | -                                                                                                                                   | n                                    | -                          | AGNA                   |
| 6             | +                                                                                                                                                            | -                      | +                                                             | +                                                                                     | -                                                                     | -                                       | +                                          | -                                                                                                                                   | +                                    | +                          | NDMA                   |
| 7             | +                                                                                                                                                            | -                      | -                                                             | +                                                                                     | +                                                                     | +                                       | +                                          | -                                                                                                                                   | +                                    | +                          | GABA(a)                |
| 8             | +                                                                                                                                                            | +                      | -                                                             | +                                                                                     | +                                                                     | +                                       | +                                          | -                                                                                                                                   | +                                    | +                          | NMDA                   |
| 9             | +                                                                                                                                                            | -                      | -                                                             | +                                                                                     | -                                                                     | +                                       | +                                          | -                                                                                                                                   | +                                    | +                          | NMDA                   |
| 10            | +                                                                                                                                                            | +                      | +                                                             | +                                                                                     | -                                                                     | -                                       | +                                          | -                                                                                                                                   | +                                    | -                          | Anti-Yo                |
| 11            | +                                                                                                                                                            | +                      | -                                                             | -                                                                                     | n                                                                     | -                                       | +                                          | -                                                                                                                                   | -                                    | -                          | Ma2                    |
| 12            | +                                                                                                                                                            | +                      | -                                                             | -                                                                                     | -                                                                     | -                                       | +                                          | -                                                                                                                                   | +                                    | +                          | CASPR2                 |
| 13            | +                                                                                                                                                            | +                      | -                                                             | -                                                                                     | +                                                                     | -                                       | +                                          | -                                                                                                                                   | -                                    | -                          | VGCC                   |
| 14            | +                                                                                                                                                            | -                      | -                                                             | -                                                                                     | -                                                                     | +                                       | +                                          | -                                                                                                                                   | +                                    | +                          | LGI-1                  |
| 15            | +                                                                                                                                                            | +                      | -                                                             | -                                                                                     | n                                                                     | -                                       | +                                          | -                                                                                                                                   | -                                    | +                          | GAD65                  |
| 16            | +                                                                                                                                                            | -                      | +                                                             | -                                                                                     | -                                                                     | +                                       | +                                          | -                                                                                                                                   | +                                    | +                          | NMDA                   |
| 17            | +                                                                                                                                                            | +                      | +                                                             | -                                                                                     | -                                                                     | +                                       | +                                          | -                                                                                                                                   | +                                    | +                          | NMDA                   |
| 18            | +                                                                                                                                                            | +                      | +                                                             | +                                                                                     | +                                                                     | +                                       | +                                          | +                                                                                                                                   | +                                    | +                          | LGI-1                  |
| 19            | +                                                                                                                                                            | +                      | -                                                             | -                                                                                     | -                                                                     | +                                       | +                                          | -                                                                                                                                   | +                                    | +                          | DPPX                   |

**Supplementary File 1.** Clinical and paraclinical characteristics of the antibody-positive AIE (AIE<sup>+</sup>) group. All 19 patients of the AIE+ group fulfilled the previously defined diagnostic criteria for at least "possible AIE" on admission and tested positive for intrathecal antibodies during the diagnostic work-up, allowing for the diagnosis of "definite" AIE. These criteria were retrospectively applied in our cohort of suspected AIE cases ("+" applicable; "-" not applicable; "n" not applied).
