# Supplementary material for: The role of intrathecal free light chains kappa for the detection of autoimmune encephalitis in subacute onset neuropsychiatric syndromes
Source: PubMed Central journal article supplement (PMC10567819; doi:10.1038/s41598-023-44427-6), 2023-10-11
Supplement: 41598_2023_44427_MOESM2_ESM.pdf [file 41598_2023_44427_MOESM2_ESM.pdf]

## Supplementary File 2. AIE<sup>-</sup> characteristics

| AIE <sup>-</sup> Pat. Nr. | Subacute onset (rapid progression of less than 3 months) of working memory deficits (short-term memory loss), altered mental status, or psychiatric symptoms | New focal CNS findings | Seizures not explained by a previously known seizure disorder | CSF pleocytosis (white blood cell count of more than five cells per mm <sup>3</sup> ) | EEG with epileptic or slow-wave activity involving the temporal lobes | MRI features suggestive of encephalitis | Reasonable exclusion of alternative causes | Bilateral brain abnormalities on T2-weighted fluid-attenuated inversion recovery MRI highly restricted to the medial temporal lobes | Response to first-line immunotherapy | Intrathecal FLCK synthesis |
|---------------------------|--------------------------------------------------------------------------------------------------------------------------------------------------------------|------------------------|---------------------------------------------------------------|---------------------------------------------------------------------------------------|-----------------------------------------------------------------------|-----------------------------------------|--------------------------------------------|-------------------------------------------------------------------------------------------------------------------------------------|--------------------------------------|----------------------------|
| 1                         | +                                                                                                                                                            | +                      | -                                                             | +                                                                                     | n                                                                     | +                                       | -                                          | -                                                                                                                                   | -                                    | -                          |
| 2                         | +                                                                                                                                                            | +                      | -                                                             | -                                                                                     | -                                                                     | -                                       | +                                          | -                                                                                                                                   | -                                    | -                          |
| 3                         | +                                                                                                                                                            | +                      | -                                                             | +                                                                                     | n                                                                     | +                                       | +                                          | -                                                                                                                                   | +                                    | +                          |
| 4                         | +                                                                                                                                                            | +                      | -                                                             | +                                                                                     | -                                                                     | -                                       | +                                          | -                                                                                                                                   | +                                    | +                          |
| 5                         | -                                                                                                                                                            | +                      | +                                                             | +                                                                                     | +                                                                     | +                                       | -                                          | -                                                                                                                                   | n                                    | -                          |
| 6                         | +                                                                                                                                                            | +                      | -                                                             | +                                                                                     | n                                                                     | +                                       | +                                          | -                                                                                                                                   | +                                    | +                          |
| 7                         | +                                                                                                                                                            | +                      | +                                                             | -                                                                                     | +                                                                     | +                                       | +                                          | -                                                                                                                                   | +                                    | +                          |
| 8                         | +                                                                                                                                                            | +                      | -                                                             | +                                                                                     | -                                                                     | -                                       | +                                          | -                                                                                                                                   | n                                    | +                          |
| 9                         | +                                                                                                                                                            | -                      | -                                                             | +                                                                                     | -                                                                     | -                                       | +                                          | -                                                                                                                                   | +                                    | +                          |
| 10                        | +                                                                                                                                                            | +                      | -                                                             | +                                                                                     | -                                                                     | +                                       | +                                          | -                                                                                                                                   | n                                    | -                          |
| 11                        | +                                                                                                                                                            | +                      | -                                                             | -                                                                                     | +                                                                     | -                                       | -                                          | -                                                                                                                                   | n                                    | -                          |
| 12                        | +                                                                                                                                                            | +                      | -                                                             | -                                                                                     | -                                                                     | +                                       | -                                          | -                                                                                                                                   | -                                    | -                          |
| 13                        | +                                                                                                                                                            | -                      | -                                                             | -                                                                                     | -                                                                     | +                                       | +                                          | -                                                                                                                                   | +                                    | +                          |
| 14                        | -                                                                                                                                                            | -                      | +                                                             | -                                                                                     | n                                                                     | +                                       | -                                          | -                                                                                                                                   | n                                    | -                          |
| 15                        | -                                                                                                                                                            | +                      | -                                                             | -                                                                                     | -                                                                     | -                                       | -                                          | -                                                                                                                                   | n                                    | -                          |
| 16                        | +                                                                                                                                                            | +                      | -                                                             | -                                                                                     | -                                                                     | +                                       | -                                          | -                                                                                                                                   | +                                    | -                          |
| 17                        | +                                                                                                                                                            | +                      | -                                                             | -                                                                                     | n                                                                     | -                                       | -                                          | -                                                                                                                                   | +                                    | -                          |
| 18                        | +                                                                                                                                                            | -                      | -                                                             | -                                                                                     | -                                                                     | +                                       | -                                          | -                                                                                                                                   | -                                    | -                          |

**Supplementary File 2.** Characteristics of the antibody-negative (AIE<sup>-</sup>) group. Of 18 patients labeled as potential AIE on admission, 9 fulfilled the previously defined diagnostic criteria for at least "possible AIE". These criteria were retrospectively applied in our cohort of suspected AIE cases ("+" applicable; "-" not applicable; "n" not applied).
