# Supplementary material for: The role of intrathecal free light chains kappa for the detection of autoimmune encephalitis in subacute onset neuropsychiatric syndromes
Source: PubMed Central journal article supplement (PMC10567819; doi:10.1038/s41598-023-44427-6), 2023-10-11
Supplement: 41598_2023_44427_MOESM3_ESM.pdf [file 41598_2023_44427_MOESM3_ESM.pdf]

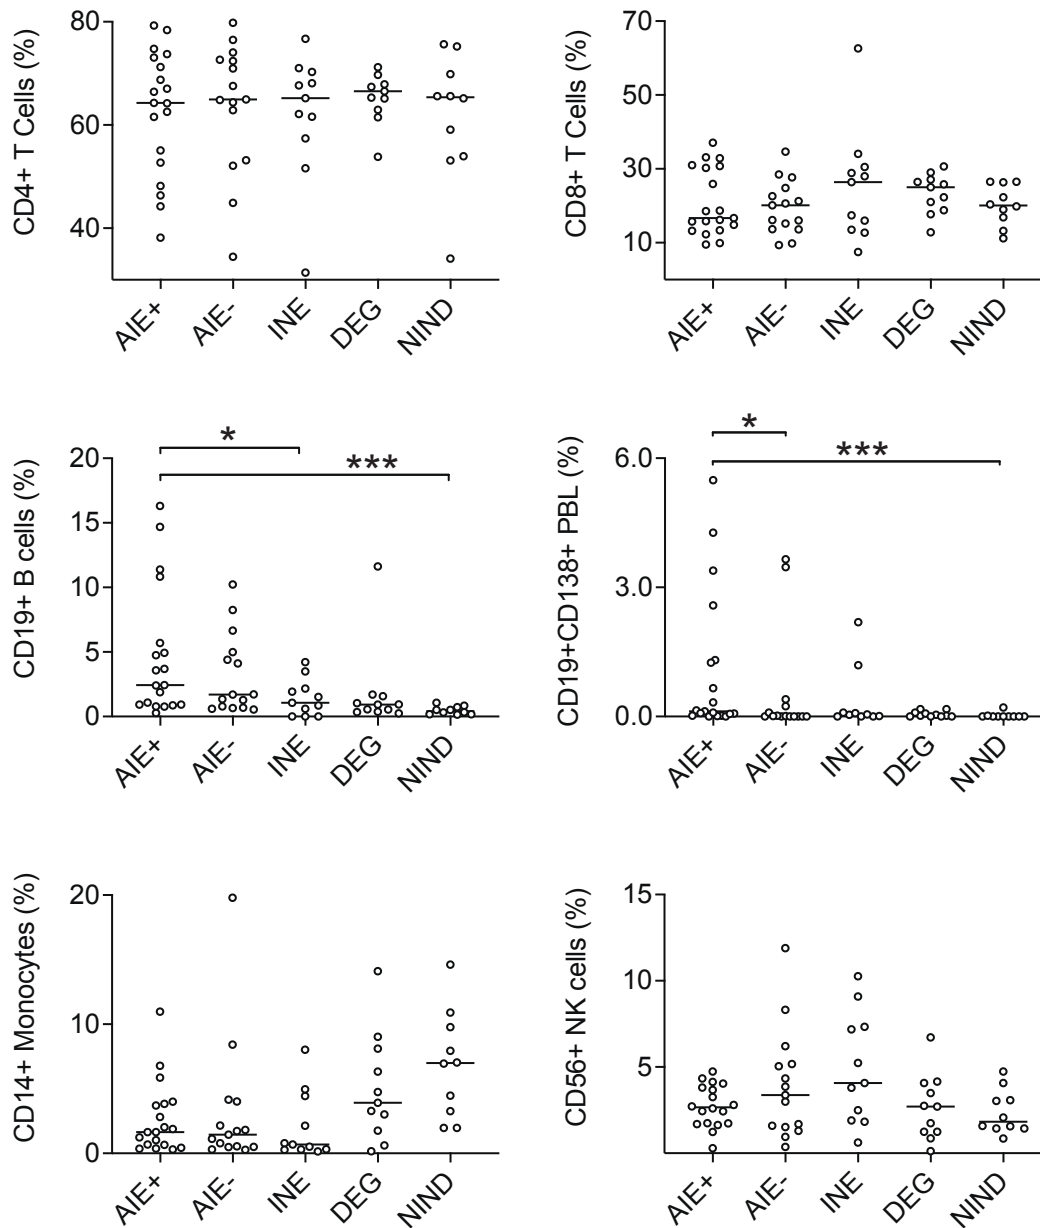

**Supplementary File 3. Group-specific CSF immune cell fractions.** CD4<sup>+</sup> and CD8<sup>+</sup> T cells, CD19<sup>+</sup> B cells, CD19<sup>+</sup>CD138<sup>+</sup> immature plasma blasts (PBL), CD14<sup>+</sup> monocytes, and CD56<sup>+</sup> NK cells. (\*  $p \leq 0.05$ , \*\*  $p \leq 0.01$ , \*\*\*  $p \leq 0.001$ , \*\*\*\*  $p \leq 0.0001$ ).
