# Supplementary material for: The role of intrathecal free light chains kappa for the detection of autoimmune encephalitis in subacute onset neuropsychiatric syndromes
Source: PubMed Central journal article supplement (PMC10567819; doi:10.1038/s41598-023-44427-6), 2023-10-11
Supplement: 41598_2023_44427_MOESM4_ESM.pdf [file 41598_2023_44427_MOESM4_ESM.pdf]

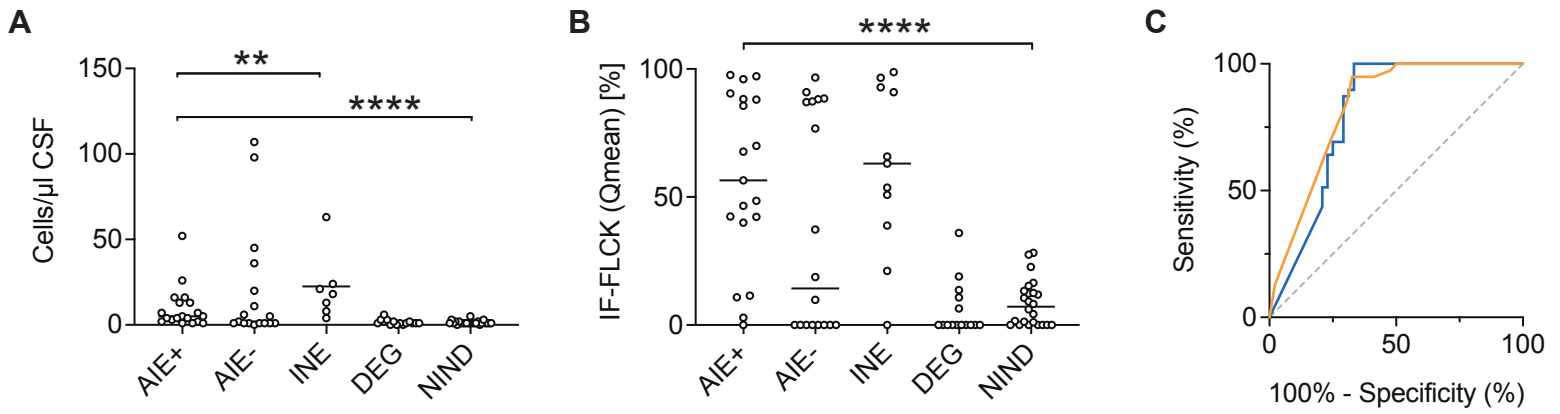

**Supplementary File 4. Comparison of IF-FLCK and CSF white cell count. (A)** Group-specific CSF white cell counts. **(B)** Group specific IF-FLCK, IF-FLCK (Qmean). **(C)** Receiver operating characteristics for IF-FLCK > Qlim (blue line, AUC = 0.809,  $p = 0.001$ ) and CSF white cell count (orange line, AUC = 0.852,  $p = 0.0002$ ) as to the differentiation of inflammatory (AIE<sup>+</sup>, AIE<sup>-</sup>, INE) vs non-inflammatory (DGE) encephalopathy and NIND. (\*  $p \leq 0.05$ , \*\*  $p \leq 0.01$ , \*\*\*  $p \leq 0.001$ , \*\*\*\*  $p \leq 0.0001$ ).
